# Supplementary material for: Detection of Bulbar Involvement in Patients With Amyotrophic Lateral Sclerosis by Machine Learning Voice Analysis: Diagnostic Decision Support Development Study
Source: PubMed Central journal article supplement (PMC7991994; doi:10.2196/21331), 2021-03-10
Supplement: medinform_v9i3e21331_app1.pdf [file medinform_v9i3e21331_app1.pdf]

# Multimedia Appendix: ALS participants. Clinical Records.

This is a Multimedia Appendix to a full manuscript published in the J Med Internet Res. For full copyright and citation information see <http://dx.doi.org/10.2196/jmir.21331>

TABLE I: ALS Participants Clinical Records.

| ID     | Age<br>(years) | Sex | Onset<br>Type | ALSFR-R<br>(Total Score) | Bulbar<br>Involvement | Type<br>(Bulbar Involvement) |
|--------|----------------|-----|---------------|--------------------------|-----------------------|------------------------------|
| HUB001 | 53             | F   | SPINAL        | 29                       | YES                   | Dysphagia/Dysarthria         |
| HUB002 | 52             | F   | BULBAR        | 27                       | YES                   | Dysphagia                    |
| HUB003 | 71             | M   | SPINAL        | 39                       | NO                    | No Symptoms                  |
| HUB004 | 52             | M   | SPINAL        | 43                       | NO                    | No Symptoms                  |
| HUB005 | 49             | M   | SPINAL        | NA                       | NO                    | No Symptoms                  |
| HUB006 | 70             | F   | BULBAR        | 23                       | YES                   | Dysphagia/Dysarthria         |
| HUB007 | 70             | M   | SPINAL        | 27                       | NO                    | No Symptoms                  |
| HUB008 | 67             | F   | SPINAL        | 33                       | YES                   | Dyspnoea                     |
| HUB009 | 71             | F   | SPINAL        | 32                       | YES                   | Dysphagia                    |
| HUB010 | 72             | M   | SPINAL        | 30                       | NO                    | No Symptoms                  |
| HUB011 | 43             | F   | SPINAL        | 21                       | YES                   | Dysphagia                    |
| HUB012 | 70             | F   | SPINAL        | 28                       | YES                   | Dysphagia                    |
| HUB013 | 41             | M   | SPINAL        | 34                       | NO                    | No Symptoms                  |
| HUB014 | 70             | M   | SPINAL        | 46                       | NO                    | No Symptoms                  |
| HUB015 | 58             | F   | BULBAR        | 46                       | YES                   | Dysarthria                   |
| HUB016 | 55             | M   | SPINAL        | 26                       | NO                    | No Symptoms                  |
| HUB017 | 48             | F   | SPINAL        | 36                       | NO                    | No Symptoms                  |
| HUB018 | 58             | M   | SPINAL        | 28                       | YES                   | NA                           |
| HUB019 | 63             | M   | SPINAL        | 22                       | NO                    | No Symptoms                  |
| HUB020 | 50             | M   | SPINAL        | 39                       | NO                    | No Symptoms                  |
| HUB021 | 84             | F   | BULBAR        | 30                       | YES                   | NA                           |
| HUB022 | 52             | M   | SPINAL        | 33                       | NO                    | No Symptoms                  |
| HUB023 | 56             | M   | SPINAL        | 27                       | NO                    | No Symptoms                  |
| HUB024 | 65             | M   | SPINAL        | 24                       | NO                    | No Symptoms                  |
| HUB025 | 68             | F   | SPINAL        | 21                       | NO                    | No Symptoms                  |
| HUB026 | 66             | F   | SPINAL        | 41                       | NO                    | No Symptoms                  |
| HUB027 | 81             | M   | SPINAL        | 28                       | NO                    | No Symptoms                  |
| HUB028 | 44             | F   | SPINAL        | 19                       | NO                    | No Symptoms                  |
| HUB029 | 70             | F   | SPINAL        | 17                       | NO                    | No Symptoms                  |
| HUB030 | 72             | F   | SPINAL        | 38                       | NO                    | No Symptoms                  |
| HUB031 | 60             | M   | BULBAR        | 46                       | YES                   | NA                           |
| HUB032 | 48             | M   | SPINAL        | 31                       | NO                    | No Symptoms                  |
| HUB033 | 59             | F   | SPINAL        | 33                       | YES                   | NA                           |
| HUB034 | 37             | F   | SPINAL        | 37                       | NO                    | No Symptoms                  |
| HUB035 | 76             | F   | SPINAL        | 30                       | NO                    | No Symptoms                  |
| HUB036 | 48             | F   | SPINAL        | 29                       | YES                   | Dysphagia                    |
| HUB037 | 69             | M   | SPINAL        | 37                       | NO                    | No Symptoms                  |
| HUB038 | 81             | M   | SPINAL        | 36                       | NO                    | No Symptoms                  |
| HUB039 | 68             | M   | SPINAL        | NA                       | NO                    | No Symptoms                  |
| HUB040 | 55             | M   | SPINAL        | 24                       | NO                    | No Symptoms                  |
| HUB041 | 38             | M   | SPINAL        | 6                        | YES                   | NA                           |
| HUB042 | 56             | M   | SPINAL        | 35                       | NO                    | No Symptoms                  |
| HUB043 | 67             | M   | SPINAL        | NA                       | NO                    | No Symptoms                  |
| HUB044 | 63             | M   | SPINAL        | 42                       | NO                    | No Symptoms                  |
| HUB045 | 48             | M   | SPINAL        | 45                       | NO                    | No Symptoms                  |
