# Supplementary material for: Detection of Bulbar Involvement in Patients With Amyotrophic Lateral Sclerosis by Machine Learning Voice Analysis: Diagnostic Decision Support Development Study
Source: PubMed Central journal article supplement (PMC7991994; doi:10.2196/21331), 2021-03-10
Supplement: medinform_v9i3e21331_app2.pdf [file medinform_v9i3e21331_app2.pdf]

# Multimedia Appendix: Paired t-test with Bonferroni correction.

This is a Multimedia Appendix to a full manuscript published in the J Med Internet Res. For full copyright and citation information see <http://dx.doi.org/10.2196/jmir.21331>

| <i>P</i> values | Supervised Classification Models |        |        |        |      |
|-----------------|----------------------------------|--------|--------|--------|------|
|                 | LDA                              | LR     | NaB    | NN     | RF   |
| LR              | < .001                           | -      | -      | -      | -    |
| NaB             | < .001                           | < .001 | -      | -      | -    |
| NN              | .04                              | .03    | < .001 | -      | -    |
| RF              | < .001                           | .69    | .01    | .01    | -    |
| SVM             | .37                              | .04    | < .001 | < .001 | .003 |

TABLE I: Paired t-test with Bonferroni correction for C vs. B with a classification threshold of 50%.

| <i>P</i> values | Supervised Classification Models |        |        |      |     |
|-----------------|----------------------------------|--------|--------|------|-----|
|                 | LDA                              | LR     | NaB    | NN   | RF  |
| LR              | .57                              | -      | -      | -    | -   |
| NaB             | < .001                           | < .001 | -      | -    | -   |
| NN              | .02                              | .01    | < .001 | -    | -   |
| RF              | .44                              | .67    | < .001 | .008 | -   |
| SVM             | .84                              | .58    | < .001 | .009 | .50 |

TABLE II: Paired t-test with Bonferroni correction for C vs. NB with a classification threshold of 50%.

| <i>P</i> values | Supervised Classification Models |        |        |        |        |
|-----------------|----------------------------------|--------|--------|--------|--------|
|                 | LDA                              | LR     | NaB    | NN     | RF     |
| LR              | .003                             | -      | -      | -      | -      |
| NaB             | .005                             | < .001 | -      | -      | -      |
| NN              | .44                              | .61    | .00172 | -      | -      |
| RF              | < .001                           | < .001 | .89    | < .001 | -      |
| SVM             | .01701                           | .82    | < .001 | .54    | < .001 |

TABLE III: Paired t-test with Bonferroni correction for B vs. NB with a classification threshold of 50%.

| <i>P</i> values | Supervised Classification Models |        |        |      |      |
|-----------------|----------------------------------|--------|--------|------|------|
|                 | LDA                              | LR     | NaB    | NN   | RF   |
| LR              | .76                              | -      | -      | -    | -    |
| NaB             | < .001                           | < .001 | -      | -    | -    |
| NN              | .08                              | .04    | < .001 | -    | -    |
| RF              | .002                             | .004   | < .001 | .004 | -    |
| SVM             | .86                              | .83    | < .001 | .02  | .002 |

TABLE IV: Paired t-test with Bonferroni correction for C vs. ALS with a classification threshold of 50%.

| <i>P</i> values | Supervised Classification Models |        |        |        |        |
|-----------------|----------------------------------|--------|--------|--------|--------|
|                 | LDA                              | LR     | NaB    | NN     | RF     |
| LR              | < .001                           | -      | -      | -      | -      |
| NaB             | < .001                           | < .001 | -      | -      | -      |
| NN              | < .001                           | .69    | < .001 | -      | -      |
| RF              | < .001                           | < .001 | < .001 | < .001 | -      |
| SVM             | .003                             | < .001 | .09    | < .001 | < .001 |

TABLE V: Paired t-test with Bonferroni correction for C vs. B with a classification threshold of 95%.

| <i>P</i> values | Supervised Classification Models |        |        |        |      |
|-----------------|----------------------------------|--------|--------|--------|------|
|                 | LDA                              | LR     | NaB    | NN     | RF   |
| LR              | < .001                           | -      | -      | -      | -    |
| NaB             | .008                             | < .001 | -      | -      | -    |
| NN              | < .001                           | < .001 | < .001 | -      | -    |
| RF              | .002                             | < .001 | < .001 | < .001 | -    |
| SVM             | .83                              | < .001 | .014   | < .001 | .001 |

TABLE VI: Paired t-test with Bonferroni correction for C vs. NB with a classification threshold of 95%.

| <i>P</i> values | Supervised Classification Models |        |        |        |     |
|-----------------|----------------------------------|--------|--------|--------|-----|
|                 | LDA                              | LR     | NaB    | NN     | RF  |
| LR              | .002                             | -      | -      | -      | -   |
| NaB             | < .001                           | .03    | -      | -      | -   |
| NN              | .07                              | .68    | .09    | -      | -   |
| RF              | < .001                           | < .001 | < .001 | < .001 | -   |
| SVM             | .005                             | < .001 | < .001 | < .001 | .06 |

TABLE VII: Paired t-test with Bonferroni correction for B vs. NB with a classification threshold of 95%.

| <i>P</i> values | Supervised Classification Models |        |        |        |     |
|-----------------|----------------------------------|--------|--------|--------|-----|
|                 | LDA                              | LR     | NaB    | NN     | RF  |
| LR              | < .001                           | -      | -      | -      | -   |
| NaB             | .34                              | .04    | -      | -      | -   |
| NN              | < .001                           | < .001 | < .001 | -      | -   |
| RF              | .71                              | < .001 | .23    | < .001 | -   |
| SVM             | .37                              | < .001 | .48    | < .001 | .42 |

TABLE VIII: Paired t-test with Bonferroni correction for C vs. ALS with a classification threshold of 95%.
